# Supplementary material for: Reduced expression of CDP-DAG synthase changes lipid composition and leads to male sterility in Drosophila
Source: PubMed Central journal article supplement (PMC4736822; doi:10.1098/rsob.150169), 2016-01-20
Supplement: rsob150169supp1.pdf [file rsob150169supp1.pdf]

1 **Supplementary Material**

2

3 **Figure S1. Post-meiotic phenotypes of the male sterile mutant and rescued *CdsA* testes.**

4 (A-D) Phenotypes of the male sterile *CdsA*<sup>EY08412</sup> (A, B) and *CdsA*<sup>UM-8246-3</sup> (C, D) testes.  
5 Confocal micrographs of dispersed actin cones in *CdsA*<sup>EY08412</sup> (A) and *CdsA*<sup>UM-8246-3</sup> (C) cysts.  
6 Phase contrast images of the whole testis with empty seminal vesicle (red line) in *CdsA*<sup>EY08412</sup>  
7 (B) and *CdsA*<sup>UM-8246-3</sup> (D). (E, G, I) Confocal micrographs of actin cones in *CdsA*<sup>msl</sup> revertant  
8 (E), *CdsA*-GFP; *bamGal4*, *CdsA*<sup>msl</sup> (G), and in  $\beta$ 2tub-dPIS; *CdsA*<sup>msl</sup> (I) alleles. (F, H, J)  
9 Phase contrast images of whole testis with seminal vesicles (red line) and with matured,  
10 moving sperms (arrowhead) in *CdsA*<sup>msl</sup> revertant (F), *CdsA*-GFP; *bamGal4*, *CdsA*<sup>msl</sup>, (H), and  
11 in  $\beta$ 2tub-dPIS; *CdsA*<sup>msl</sup> (J). Scale bars: 50  $\mu$ m in A, C, E, G, I, and 100  $\mu$ m in B, D, F, H, J.

12

13 **Figure S2. Expression and localization of *CdsA* and the phenotype of the mutant and**

14 **rescued *CdsA*<sup>msl</sup> testes.** (A) Schematic representation of *CdsA*-*RA* and *CdsA*-*RB* transcripts  
15 with the localization of the P[EY08412] (at base 33 in the 5'UTR of *CdsA*-*RA*), P[UM-8246-3]  
16 (at base 41 in the 5'UTR of *CdsA*-*RA*), and P[CB0128] (at base 64 in the 5'UTR of *CdsA*-*RA*)  
17 elements, and the primers used in the quantitative RT-PCR. (B) Relative expression levels of  
18 *CdsA*-*RA*-*RB* and *CdsA*-*RB* in the testis of wild type and *CdsA*<sup>msl</sup> homozygotes were  
19 quantified by quantitative RT-PCR. Error bars indicate mean  $\pm$  s.e.m. (C) Distribution of the  
20 number of cysts at various post-meiotic stages in wild type, *CdsA*<sup>msl</sup>, *CdsA*<sup>msl</sup> revertant,  
21 *CdsA*-GFP; *CdsA*<sup>msl</sup>, and  $\beta$ 2tub-dPIS, *CdsA*<sup>msl</sup> testes, based on counting of elongated nuclei,  
22 individualization complexes (IC) (phalloidin staining), cystic bulges, and waste bags  
23 (Caspase-3 staining). Error bars indicate mean  $\pm$  s.e.m. (D) Confocal micrograph of

24 spermatocytes expressing CdsA-GFP shows ER localization (green), where ER is labelled by  
25 anti-Calnexin99A (red) and DNA by DAPI (blue). Scale bar, 10  $\mu$ m.

26

27 **Figure S3. The assembly of individualization complex is not impaired in *CdsA<sup>msl</sup>***  
28 **spermatids, but the individualization defects resulted in higher number of TUNEL**  
29 **positive structures.** (A) Individual and merged fluorescent micrographs of wild type and  
30 *CdsA<sup>msl</sup>* cystic bulges stained for Lasp (green) and for F-actin (red). Scale bar, 10  $\mu$ m. (B)  
31 Simultaneous DAPI staining (blue) and TUNEL assay (red) on spermatids. In the wild type  
32 there is no sign of cell death by TUNEL assay in the elongated cysts. Representative *CdsA<sup>msl</sup>*  
33 cyst contains TUNEL positive (red) structures in elongated spermatids. Scale bar, 40  $\mu$ m. (C)  
34 Climbing test shows normal climbing velocity in mutants of *CdsA<sup>msl</sup>*. (D) Lipid class changes  
35 in the testes of wild type, *CdsA<sup>msl</sup>* mutant, and *CdsA<sup>msl</sup>* revertant line, measured by mass  
36 spectrometry.

37

38 **Table S1. Molecular species profiles of lipids from adult testis of *Drosophila*.** The levels  
39 are normalized to total membrane lipids. Values represent mean  $\pm$  s.e.m, n=5; (\*) wild type  
40 (WT) vs. *CdsA<sup>msl</sup>* p<0.05, q<0.015; (#) WT vs.  $\beta$ 2tub-dPIS; *CdsA<sup>msl</sup>* p<0.05, q<0.015; (\$) *CdsA<sup>msl</sup>*  
41 vs.  $\beta$ 2tub-dPIS, *CdsA<sup>msl</sup>* p<0.05, q<0.015. Lipid values of dPIS, *CdsA<sup>msl</sup>* with  
42 significant compensatory-type changes are shown in bold.

43

44 **Table S2. Sequence of primers used in cloning of *P{UASp-CdsA-GFP}*, *P{\beta 2tub-dPIS}***  
45 **plasmids and in quantitative RT-PCR experiments.**

Figure S1.

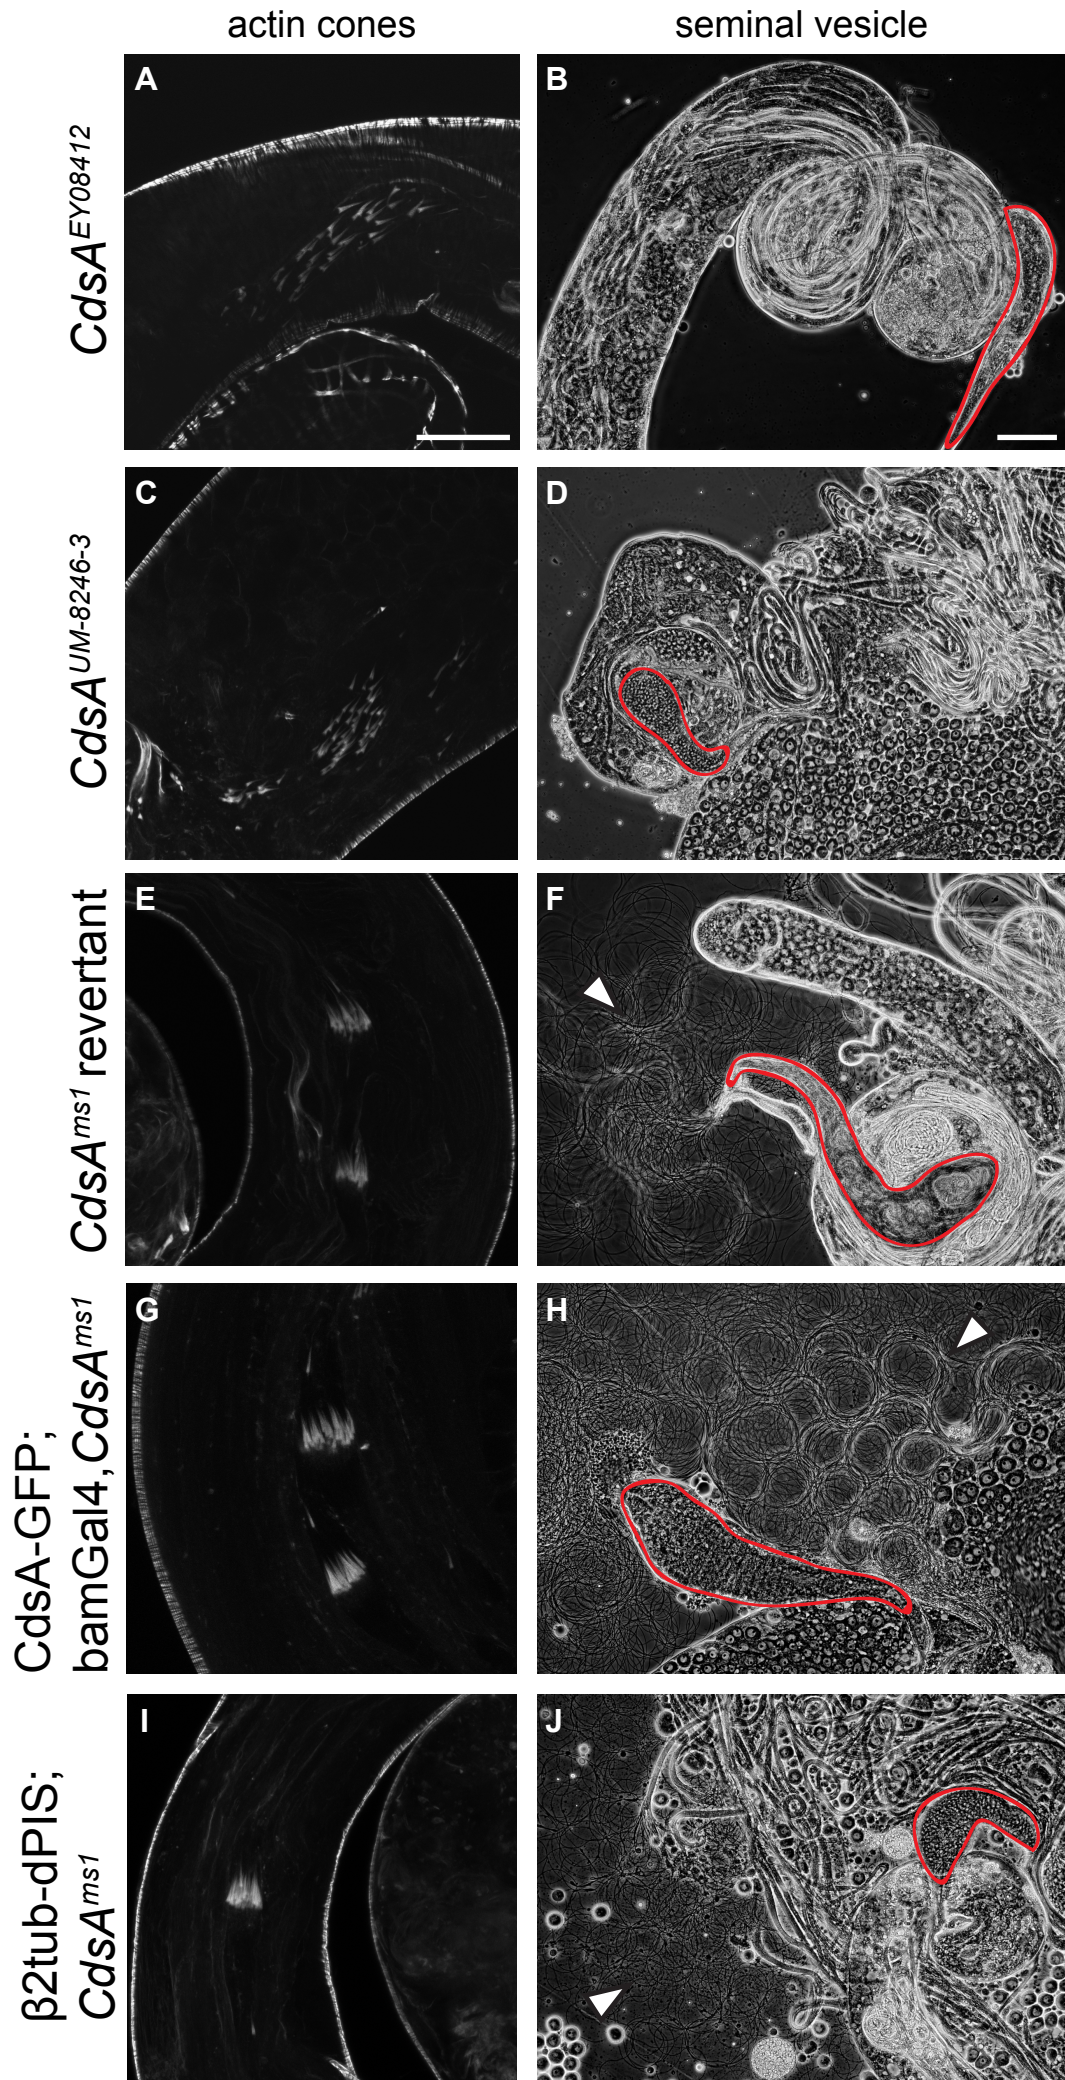

Figure S2.

**A**

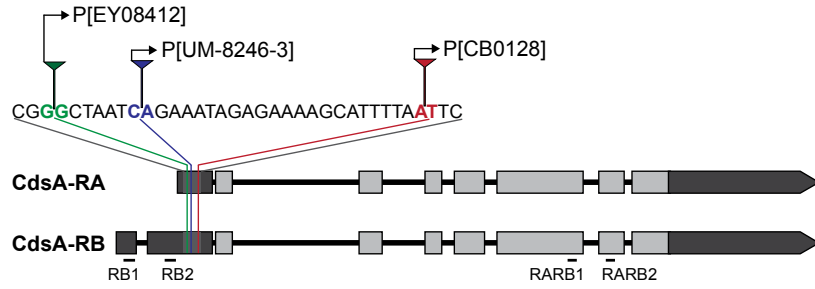

**B**

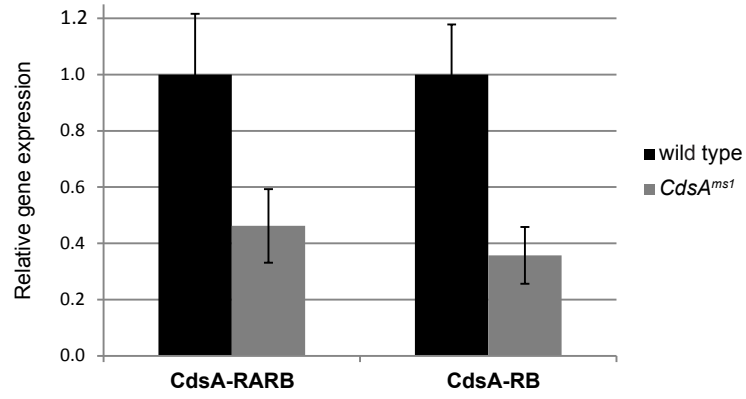

**C**

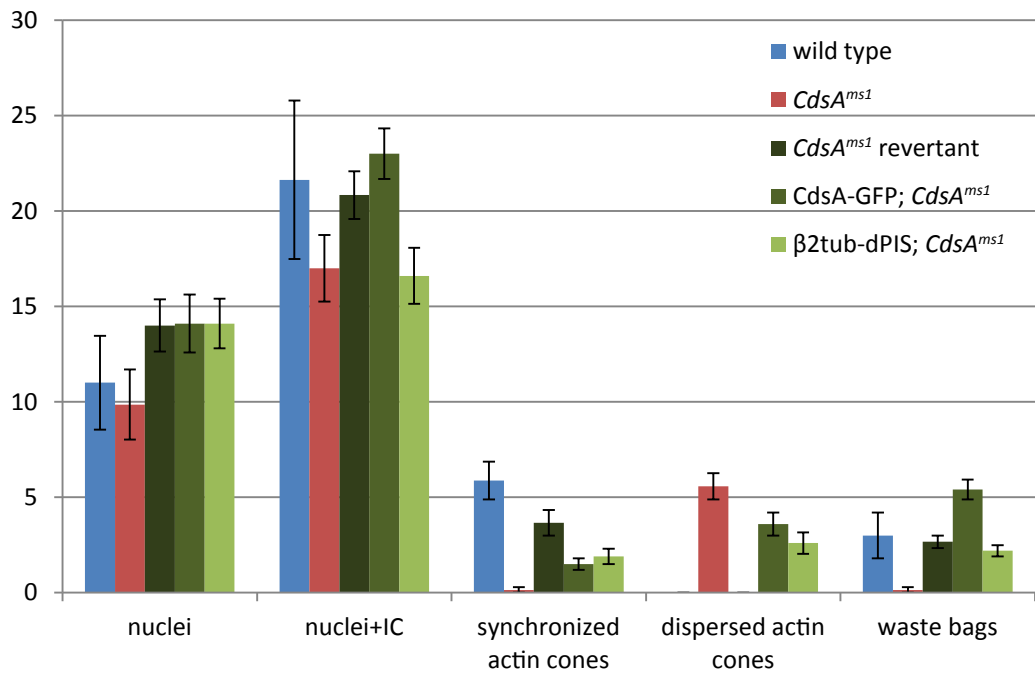

**D**

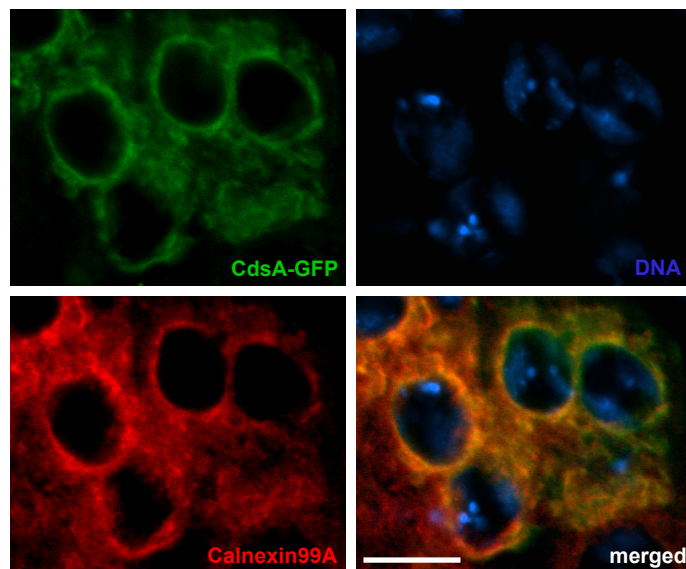

Figure S3.

A

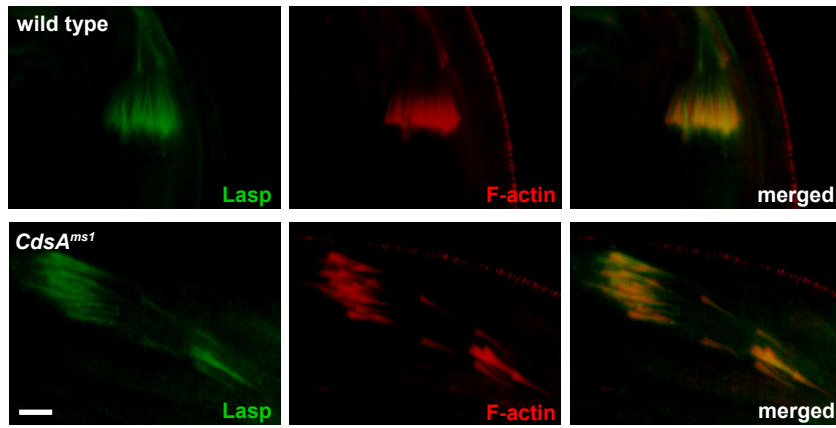

B

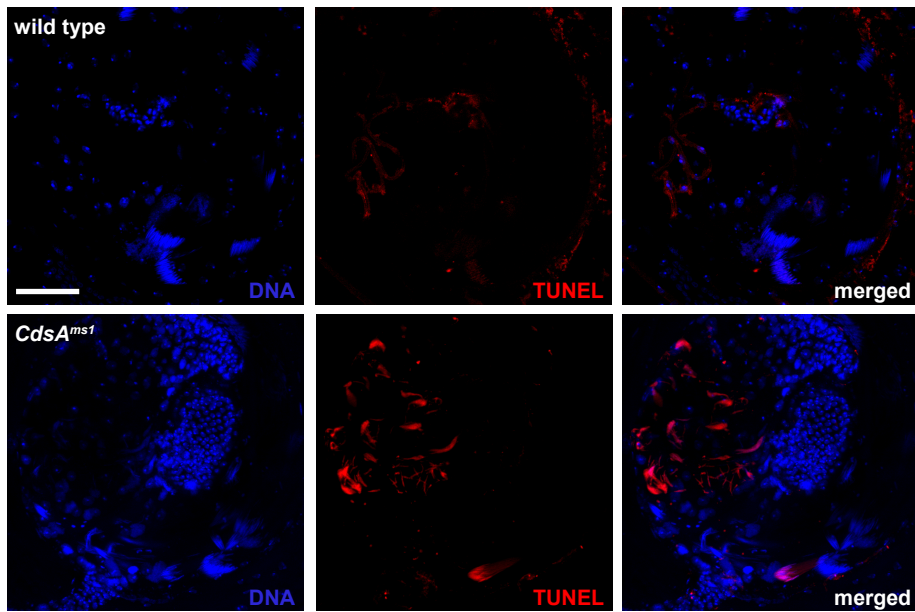

C

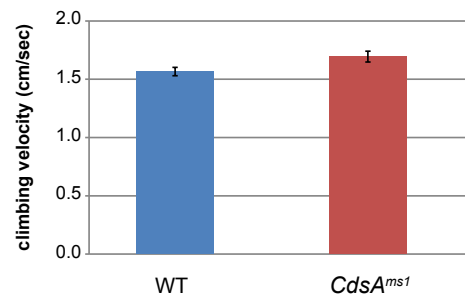

D

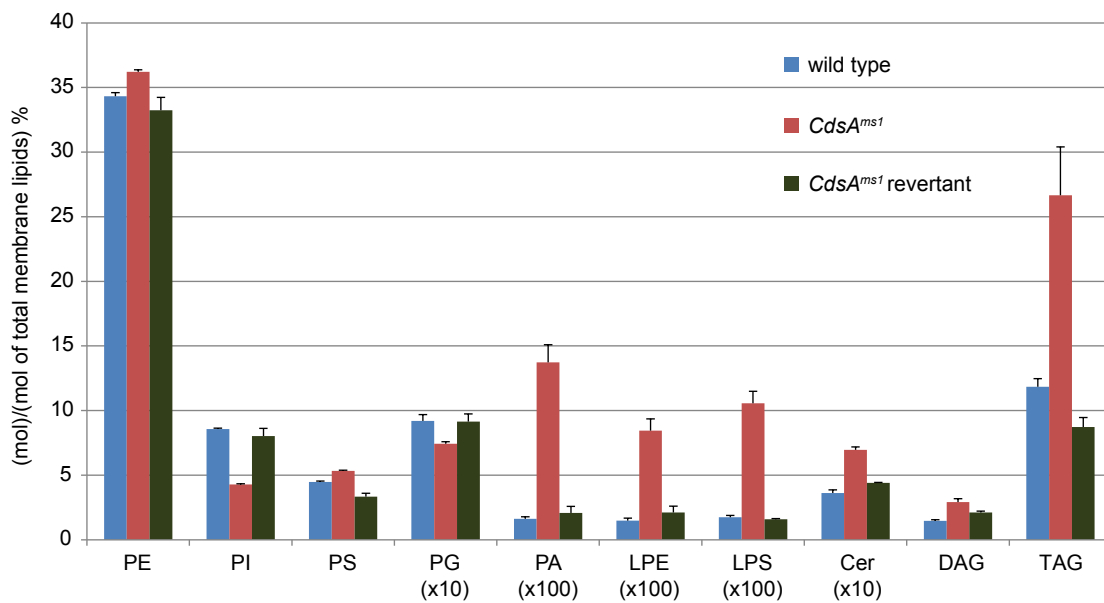

**Table S1**(\*) WT vs. *CdsA<sup>msl</sup>* p<0.05, q<0.015(#) WT vs.  $\beta$ 2tub-dPIS, *CdsA<sup>msl</sup>* p<0.05, q<0.015(\$) *CdsA<sup>msl</sup>* vs.  $\beta$ 2tub-dPIS, *CdsA<sup>msl</sup>* p<0.05, q<0.015

|              | WT             | <i>CdsA<sup>msl</sup></i> | $\beta$ 2tub-dPIS, <i>CdsA<sup>msl</sup></i> |
|--------------|----------------|---------------------------|----------------------------------------------|
| PC [32:2]    | 1.182 ± 0.077  | 0.822 ± 0.019 *           | <b>0.905 ± 0.028 # \$</b>                    |
| PC [32:1]    | 2.281 ± 0.126  | 1.606 ± 0.029 *           | <b>1.933 ± 0.026 # \$</b>                    |
| PC [34:3]    | 2.325 ± 0.088  | 2.073 ± 0.030 *           | 2.141 ± 0.067                                |
| PC [34:2]    | 7.534 ± 0.106  | 6.680 ± 0.045 *           | 6.843 ± 0.078 #                              |
| PC [34:1]    | 6.755 ± 0.100  | 5.129 ± 0.141 *           | 5.456 ± 0.077 #                              |
| PC [36:4]    | 2.457 ± 0.036  | 4.095 ± 0.100 *           | <b>3.429 ± 0.080 # \$</b>                    |
| PC [36:3]    | 5.940 ± 0.165  | 7.739 ± 0.167 *           | <b>6.866 ± 0.280 # \$</b>                    |
| PC [36:2]    | 2.523 ± 0.036  | 3.340 ± 0.086 *           | <b>2.743 ± 0.133 \$</b>                      |
| PC [36:1]    | 0.226 ± 0.013  | 0.553 ± 0.040 *           | <b>0.371 ± 0.047 # \$</b>                    |
| PC           | 31.223 ± 0.304 | 32.038 ± 0.368            | 30.687 ± 0.483                               |
| PC-O [32:2]  | 0.213 ± 0.023  | 0.179 ± 0.007             | 0.119 ± 0.012 # \$                           |
| PC-O [34:3]  | 1.705 ± 0.074  | 1.720 ± 0.054             | 1.728 ± 0.093                                |
| PC-O [34:2]  | 0.780 ± 0.019  | 1.039 ± 0.034 *           | <b>0.649 ± 0.067 \$</b>                      |
| PC-O [36:4]  | 0.657 ± 0.042  | 0.390 ± 0.019 *           | 0.366 ± 0.020 #                              |
| PC-O [36:3]  | 0.256 ± 0.010  | 0.212 ± 0.023             | 0.136 ± 0.010 # \$                           |
| PC-O         | 3.611 ± 0.158  | 3.539 ± 0.109             | 2.999 ± 0.193 \$                             |
| PE [30:1]    | 0.271 ± 0.018  | 0.252 ± 0.007             | 0.282 ± 0.041                                |
| PE [32:2]    | 0.629 ± 0.011  | 0.610 ± 0.014             | 0.656 ± 0.037                                |
| PE [32:1]    | 3.661 ± 0.086  | 3.519 ± 0.137             | 4.457 ± 0.137 # \$                           |
| PE [34:3]    | 0.803 ± 0.034  | 0.882 ± 0.017             | 1.115 ± 0.041 # \$                           |
| PE [34:2]    | 5.557 ± 0.025  | 6.330 ± 0.050 *           | 7.214 ± 0.177 # \$                           |
| PE [34:1]    | 14.415 ± 0.088 | 14.351 ± 0.299            | 15.697 ± 0.156 # \$                          |
| PE [36:4]    | 0.767 ± 0.032  | 0.897 ± 0.030 *           | 1.212 ± 0.053 # \$                           |
| PE [36:3]    | 3.447 ± 0.146  | 3.723 ± 0.034             | 4.154 ± 0.089 # \$                           |
| PE [36:2]    | 3.691 ± 0.104  | 3.996 ± 0.050 *           | 3.945 ± 0.088                                |
| PE [36:1]    | 0.626 ± 0.029  | 1.204 ± 0.067 *           | <b>0.917 ± 0.052 # \$</b>                    |
| PE [40:1]    | 0.463 ± 0.012  | 0.451 ± 0.005             | 0.479 ± 0.023                                |
| PE           | 34.331 ± 0.268 | 36.217 ± 0.147 *          | 40.129 ± 0.567 # \$                          |
| LPE [16:1]   | 0.001 ± 0.000  | 0.006 ± 0.004             | 0.003 ± 0.001                                |
| LPE [16:0]   | 0.010 ± 0.001  | 0.018 ± 0.003             | 0.017 ± 0.002                                |
| LPE [18:2]   | 0.003 ± 0.001  | 0.009 ± 0.003             | 0.007 ± 0.002                                |
| LPE [22:0]   | 0.001 ± 0.000  | 0.051 ± 0.006 *           | <b>0.014 ± 0.007 \$</b>                      |
| LPE          | 0.015 ± 0.002  | 0.085 ± 0.014 *           | <b>0.042 ± 0.003 # \$</b>                    |
| PE-PI [32:1] | 0.603 ± 0.051  | 0.574 ± 0.029             | 0.357 ± 0.028 # \$                           |
| PE-PI [34:3] | 0.337 ± 0.018  | 0.357 ± 0.010             | 0.766 ± 0.039 # \$                           |
| PE-PI [34:2] | 5.225 ± 0.073  | 4.153 ± 0.105 *           | <b>4.803 ± 0.158 \$</b>                      |

|              |                |                 |                           |
|--------------|----------------|-----------------|---------------------------|
| PE-PI [34:1] | 3.903 ± 0.052  | 4.711 ± 0.085 * | <b>2.844 ± 0.141 # \$</b> |
| PE-PI [36:3] | 0.253 ± 0.005  | 0.138 ± 0.002 * | <b>0.165 ± 0.004 # \$</b> |
| PE-PI [36:2] | 0.419 ± 0.012  | 0.427 ± 0.010   | 0.390 ± 0.013             |
| PE-PI [36:1] | 0.244 ± 0.010  | 0.347 ± 0.006 * | <b>0.266 ± 0.006 \$</b>   |
| PE-PI [38:3] | 0.394 ± 0.010  | 0.382 ± 0.010   | 0.359 ± 0.008 #           |
| PE-PI [38:2] | 0.522 ± 0.009  | 0.694 ± 0.014 * | <b>0.370 ± 0.017 # \$</b> |
| PE-PI [38:1] | 0.186 ± 0.002  | 0.231 ± 0.010 * | <b>0.113 ± 0.006 # \$</b> |
| PE-PI        | 12.088 ± 0.141 | 12.014 ± 0.217  | 10.433 ± 0.307 # \$       |
| PI [32:1]    | 0.246 ± 0.013  | 0.175 ± 0.004 * | 0.146 ± 0.009 # \$        |
| PI [34:3]    | 0.231 ± 0.006  | 0.164 ± 0.003 * | <b>0.205 ± 0.013 \$</b>   |
| PI [34:2]    | 1.940 ± 0.045  | 1.076 ± 0.030 * | <b>1.213 ± 0.036 # \$</b> |
| PI [34:1]    | 2.413 ± 0.038  | 0.652 ± 0.021 * | 0.656 ± 0.024 #           |
| PI [36:4]    | 0.162 ± 0.005  | 0.129 ± 0.004 * | <b>0.165 ± 0.007 \$</b>   |
| PI [36:3]    | 1.355 ± 0.054  | 1.054 ± 0.019 * | 1.086 ± 0.018 #           |
| PI [36:2]    | 1.653 ± 0.004  | 0.889 ± 0.033 * | 0.764 ± 0.057 #           |
| PI [36:1]    | 0.567 ± 0.021  | 0.148 ± 0.006 * | 0.157 ± 0.016 #           |
| PI           | 8.568 ± 0.068  | 4.286 ± 0.050 * | 4.393 ± 0.026 #           |
| PS [32:1]    | 0.042 ± 0.001  | 0.053 ± 0.005   | 0.063 ± 0.002 #           |
| PS [34:2]    | 0.164 ± 0.002  | 0.217 ± 0.003 * | 0.246 ± 0.005 # \$        |
| PS [34:1]    | 0.288 ± 0.006  | 0.447 ± 0.012 * | 0.496 ± 0.013 # \$        |
| PS [36:4]    | 0.064 ± 0.003  | 0.092 ± 0.003 * | 0.107 ± 0.003 # \$        |
| PS [36:3]    | 0.336 ± 0.012  | 0.487 ± 0.015 * | 0.515 ± 0.019 #           |
| PS [36:2]    | 1.298 ± 0.045  | 1.438 ± 0.024 * | 1.438 ± 0.052             |
| PS [36:1]    | 0.191 ± 0.005  | 0.367 ± 0.019 * | <b>0.288 ± 0.016 # \$</b> |
| PS [38:3]    | 0.020 ± 0.004  | 0.026 ± 0.003   | 0.035 ± 0.002 # \$        |
| PS [38:2]    | 0.194 ± 0.003  | 0.185 ± 0.001 * | 0.180 ± 0.002 #           |
| PS [38:1]    | 0.337 ± 0.007  | 0.303 ± 0.006 * | 0.268 ± 0.006 # \$        |
| PS [40:2]    | 0.245 ± 0.003  | 0.322 ± 0.008 * | 0.294 ± 0.016 #           |
| PS [40:1]    | 0.930 ± 0.028  | 1.114 ± 0.025 * | 1.035 ± 0.068             |
| PS [42:2]    | 0.152 ± 0.006  | 0.134 ± 0.002 * | 0.120 ± 0.004 # \$        |
| PS [42:1]    | 0.042 ± 0.003  | 0.028 ± 0.002 * | 0.036 ± 0.004             |
| PS [44:2]    | 0.169 ± 0.006  | 0.114 ± 0.002 * | <b>0.136 ± 0.005 # \$</b> |
| PS           | 4.470 ± 0.068  | 5.326 ± 0.054 * | 5.257 ± 0.126 #           |
| LPS [20:0]   | 0.000 ± 0.000  | 0.006 ± 0.002 * | 0.004 ± 0.002             |
| LPS [22:0]   | 0.017 ± 0.002  | 0.098 ± 0.007 * | 0.058 ± 0.025             |
| LPS [24:1]   | 0.000 ± 0.000  | 0.002 ± 0.000 * | <b>0.000 ± 0.000 \$</b>   |
| LPS          | 0.017 ± 0.002  | 0.106 ± 0.009 * | 0.062 ± 0.027             |
| PG [30:2]    | 0.014 ± 0.004  | 0.008 ± 0.002   | 0.008 ± 0.003             |
| PG [32:3]    | 0.032 ± 0.006  | 0.030 ± 0.006   | 0.025 ± 0.006             |
| PG [32:1]    | 0.077 ± 0.008  | 0.066 ± 0.003   | 0.064 ± 0.002             |
| PG [34:3]    | 0.068 ± 0.007  | 0.062 ± 0.002   | 0.077 ± 0.006 \$          |
| PG [34:2]    | 0.253 ± 0.010  | 0.211 ± 0.005 * | <b>0.247 ± 0.011 \$</b>   |
| PG [34:1]    | 0.314 ± 0.013  | 0.211 ± 0.005 * | 0.213 ± 0.007 #           |
| PG [36:4]    | 0.007 ± 0.001  | 0.011 ± 0.002   | 0.013 ± 0.001 #           |

|                |               |                 |                           |
|----------------|---------------|-----------------|---------------------------|
| PG [36:3]      | 0.088 ± 0.003 | 0.095 ± 0.004   | 0.098 ± 0.004             |
| PG [36:2]      | 0.065 ± 0.000 | 0.050 ± 0.003 * | 0.048 ± 0.003 #           |
| PG             | 0.919 ± 0.050 | 0.744 ± 0.015 * | <b>0.792 ± 0.006 # \$</b> |
| PA [32:1]      | 0.000 ± 0.000 | 0.002 ± 0.000 * | 0.001 ± 0.000 #           |
| PA [34:3]      | 0.000 ± 0.000 | 0.002 ± 0.000 * | 0.001 ± 0.000 #           |
| PA [34:2]      | 0.004 ± 0.000 | 0.027 ± 0.003 * | <b>0.013 ± 0.001 # \$</b> |
| PA [34:1]      | 0.011 ± 0.001 | 0.061 ± 0.002 * | <b>0.038 ± 0.003 # \$</b> |
| PA [36:3]      | 0.000 ± 0.000 | 0.008 ± 0.002 * | <b>0.003 ± 0.000 # \$</b> |
| PA [36:2]      | 0.001 ± 0.000 | 0.027 ± 0.003 * | <b>0.004 ± 0.001 \$</b>   |
| PA [36:1]      | 0.000 ± 0.000 | 0.010 ± 0.002 * | <b>0.003 ± 0.001 # \$</b> |
| PA             | 0.016 ± 0.002 | 0.137 ± 0.009 * | <b>0.063 ± 0.004 # \$</b> |
| LPA [18:3]     | 0.001 ± 0.000 | 0.001 ± 0.000   | 0.001 ± 0.000             |
| LPA [18:1]     | 0.000 ± 0.000 | 0.001 ± 0.000   | 0.000 ± 0.000             |
| LPA [18:0]     | 0.001 ± 0.000 | 0.003 ± 0.001 * | 0.002 ± 0.001             |
| LPA [20:0]     | 0.000 ± 0.000 | 0.002 ± 0.000 * | 0.001 ± 0.000             |
| LPA            | 0.002 ± 0.000 | 0.007 ± 0.001 * | 0.005 ± 0.001             |
| CL [64:4]      | 0.013 ± 0.001 | 0.014 ± 0.002   | 0.015 ± 0.003             |
| CL [66:5]      | 0.057 ± 0.003 | 0.048 ± 0.002   | 0.039 ± 0.002 # \$        |
| CL [68:7]      | 0.011 ± 0.001 | 0.011 ± 0.000   | 0.013 ± 0.001 \$          |
| CL [68:6]      | 0.166 ± 0.007 | 0.136 ± 0.004 * | 0.101 ± 0.001 # \$        |
| CL [70:8]      | 0.027 ± 0.001 | 0.031 ± 0.000 * | 0.040 ± 0.002 # \$        |
| CL [70:7]      | 0.274 ± 0.014 | 0.261 ± 0.009   | 0.215 ± 0.007 # \$        |
| CL [72:9]      | 0.034 ± 0.002 | 0.044 ± 0.002 * | 0.069 ± 0.003 # \$        |
| CL [72:8]      | 0.217 ± 0.017 | 0.241 ± 0.016   | 0.251 ± 0.015             |
| CL             | 0.800 ± 0.033 | 0.787 ± 0.030   | 0.742 ± 0.020             |
| GlCer [32:1:2] | 0.005 ± 0.001 | 0.009 ± 0.002   | 0.009 ± 0.004             |
| GlCer [34:2:2] | 0.028 ± 0.010 | 0.033 ± 0.021   | 0.017 ± 0.005             |
| GlCer [34:1:2] | 0.047 ± 0.002 | 0.064 ± 0.008   | 0.053 ± 0.011             |
| GlCer [34:1:3] | 0.014 ± 0.004 | 0.011 ± 0.002   | 0.009 ± 0.003             |
| GlCer [36:2:2] | 0.006 ± 0.001 | 0.013 ± 0.006   | 0.006 ± 0.000             |
| GlCer [36:1:2] | 0.024 ± 0.004 | 0.045 ± 0.013   | 0.037 ± 0.005             |
| GlCer [38:2:2] | 0.009 ± 0.005 | 0.012 ± 0.004   | 0.013 ± 0.005             |
| GlCer [38:1:2] | 0.014 ± 0.002 | 0.029 ± 0.007   | 0.020 ± 0.006             |
| GlCer [40:1:2] | 0.005 ± 0.003 | 0.010 ± 0.007   | 0.003 ± 0.002             |
| GlCer          | 0.152 ± 0.006 | 0.226 ± 0.039   | 0.166 ± 0.016             |
| Cer [32:1:2]   | 0.023 ± 0.001 | 0.030 ± 0.001 * | 0.033 ± 0.002 #           |
| Cer [34:2:2]   | 0.035 ± 0.003 | 0.036 ± 0.001   | 0.032 ± 0.002             |
| Cer [34:1:2]   | 0.060 ± 0.003 | 0.090 ± 0.003 * | 0.090 ± 0.004 #           |
| Cer [34:1:3]   | 0.022 ± 0.002 | 0.030 ± 0.003   | 0.025 ± 0.005             |
| Cer [36:2:2]   | 0.083 ± 0.003 | 0.102 ± 0.003 * | 0.099 ± 0.004 #           |
| Cer [36:1:2]   | 0.024 ± 0.002 | 0.045 ± 0.002 * | 0.041 ± 0.003 #           |
| Cer [36:1:3]   | 0.004 ± 0.001 | 0.038 ± 0.002 * | <b>0.020 ± 0.007 \$</b>   |
| Cer [38:2:2]   | 0.052 ± 0.003 | 0.082 ± 0.003 * | 0.081 ± 0.004 #           |



|                |               |                 |                           |
|----------------|---------------|-----------------|---------------------------|
| Cer [38:1:3]   | 0.010 ± 0.004 | 0.115 ± 0.007 * | 0.065 ± 0.025             |
| Cer [40:2:2]   | 0.002 ± 0.000 | 0.005 ± 0.001 * | 0.009 ± 0.001 # \$        |
| Cer [40:1:2]   | 0.003 ± 0.000 | 0.003 ± 0.001   | 0.005 ± 0.001             |
| Cer [40:1:3]   | 0.015 ± 0.004 | 0.092 ± 0.005 * | 0.060 ± 0.020             |
| Cer [42:1:2]   | 0.012 ± 0.001 | 0.012 ± 0.002   | 0.015 ± 0.003             |
| Cer [42:1:3]   | 0.018 ± 0.006 | 0.017 ± 0.006   | 0.030 ± 0.006             |
| Cer            | 0.362 ± 0.025 | 0.697 ± 0.023 * | 0.605 ± 0.058 #           |
| CerPE [30:1:2] | 0.054 ± 0.002 | 0.004 ± 0.004 * | 0.029 ± 0.014             |
| CerPE [32:2:2] | 0.042 ± 0.001 | 0.029 ± 0.001 * | <b>0.033 ± 0.001 # \$</b> |
| CerPE [34:2:2] | 0.368 ± 0.019 | 0.329 ± 0.006   | 0.311 ± 0.011 #           |
| CerPE [34:1:2] | 0.704 ± 0.037 | 0.931 ± 0.008 * | <b>0.869 ± 0.015 # \$</b> |
| CerPE [36:2:2] | 1.306 ± 0.039 | 1.241 ± 0.043   | 1.168 ± 0.041             |
| CerPE [36:1:2] | 0.145 ± 0.009 | 0.292 ± 0.011 * | <b>0.244 ± 0.008 # \$</b> |
| CerPE [38:3:2] | 0.071 ± 0.003 | 0.062 ± 0.002 * | 0.061 ± 0.001 #           |
| CerPE [38:2:2] | 0.679 ± 0.050 | 0.832 ± 0.024 * | 0.822 ± 0.009 #           |
| CerPE [40:2:2] | 0.058 ± 0.003 | 0.071 ± 0.002 * | 0.091 ± 0.002 # \$        |
| CerPE          | 3.426 ± 0.157 | 3.792 ± 0.090   | 3.627 ± 0.060             |
| MAG [16:1]     | 0.005 ± 0.002 | 0.018 ± 0.005   | 0.016 ± 0.004             |
| MAG [18:2]     | 0.099 ± 0.007 | 0.332 ± 0.028 * | <b>0.221 ± 0.034 # \$</b> |
| MAG [18:1]     | 0.114 ± 0.031 | 0.406 ± 0.031 * | <b>0.278 ± 0.043 # \$</b> |
| MAG [20:0]     | 0.217 ± 0.031 | 0.785 ± 0.059 * | <b>0.485 ± 0.104 \$</b>   |
| MAG [22:0]     | 0.005 ± 0.002 | 0.028 ± 0.007   | 0.021 ± 0.005             |
| MAG            | 0.439 ± 0.069 | 1.570 ± 0.101 * | <b>1.022 ± 0.179 # \$</b> |
| DAG [30:1]     | 0.075 ± 0.011 | 0.122 ± 0.009 * | 0.096 ± 0.006             |
| DAG [32:2]     | 0.087 ± 0.011 | 0.148 ± 0.015 * | 0.135 ± 0.005 #           |
| DAG [32:1]     | 0.209 ± 0.009 | 0.324 ± 0.025 * | 0.273 ± 0.010 #           |
| DAG [34:2]     | 0.164 ± 0.005 | 0.280 ± 0.016 * | 0.247 ± 0.007 #           |
| DAG [34:1]     | 0.225 ± 0.010 | 0.401 ± 0.027 * | 0.331 ± 0.013 #           |
| DAG [36:4]     | 0.035 ± 0.002 | 0.075 ± 0.008 * | 0.056 ± 0.005 #           |
| DAG [36:3]     | 0.087 ± 0.011 | 0.180 ± 0.013 * | <b>0.132 ± 0.003 # \$</b> |
| DAG [36:2]     | 0.142 ± 0.009 | 0.278 ± 0.016 * | <b>0.215 ± 0.008 # \$</b> |
| DAG [36:1]     | 0.160 ± 0.010 | 0.373 ± 0.047 * | <b>0.235 ± 0.012 # \$</b> |
| DAG [38:2]     | 0.015 ± 0.004 | 0.097 ± 0.019 * | <b>0.035 ± 0.008 \$</b>   |
| DAG [38:1]     | 0.102 ± 0.022 | 0.276 ± 0.047 * | 0.168 ± 0.020             |
| DAG [40:1]     | 0.163 ± 0.017 | 0.363 ± 0.072   | 0.251 ± 0.033             |
| DAG            | 1.464 ± 0.084 | 2.917 ± 0.271 * | <b>2.173 ± 0.017 # \$</b> |
| TAG [42:2]     | 0.092 ± 0.006 | 0.257 ± 0.055   | 0.111 ± 0.039             |
| TAG [42:1]     | 0.344 ± 0.014 | 0.830 ± 0.193   | 0.345 ± 0.099             |
| TAG [42:0]     | 0.126 ± 0.018 | 0.455 ± 0.091 * | 0.296 ± 0.071             |
| TAG [44:2]     | 0.404 ± 0.016 | 0.936 ± 0.191   | 0.341 ± 0.085 \$          |
| TAG [44:1]     | 1.092 ± 0.045 | 2.191 ± 0.477   | 0.953 ± 0.248             |
| TAG [46:3]     | 0.178 ± 0.007 | 0.386 ± 0.064   | 0.151 ± 0.039 \$          |
| TAG [46:2]     | 1.079 ± 0.046 | 2.304 ± 0.451   | 0.972 ± 0.230 \$          |
| TAG [46:1]     | 1.745 ± 0.083 | 3.784 ± 0.734   | 1.832 ± 0.389             |

|            |                |                  |                           |
|------------|----------------|------------------|---------------------------|
| TAG [48:3] | 0.415 ± 0.016  | 0.840 ± 0.104 *  | <b>0.475 ± 0.065 \$</b>   |
| TAG [48:2] | 1.403 ± 0.076  | 3.065 ± 0.480 *  | <b>1.569 ± 0.278 \$</b>   |
| TAG [48:1] | 1.226 ± 0.068  | 3.076 ± 0.499 *  | 1.768 ± 0.322             |
| TAG [50:4] | 0.080 ± 0.008  | 0.186 ± 0.013 *  | <b>0.137 ± 0.005 # \$</b> |
| TAG [50:3] | 0.359 ± 0.015  | 0.755 ± 0.061 *  | <b>0.506 ± 0.039 # \$</b> |
| TAG [50:2] | 0.832 ± 0.040  | 1.899 ± 0.219 *  | <b>1.142 ± 0.151 \$</b>   |
| TAG [50:1] | 0.366 ± 0.021  | 0.820 ± 0.045 *  | <b>0.627 ± 0.059 # \$</b> |
| TAG [52:4] | 0.148 ± 0.007  | 0.372 ± 0.011 *  | <b>0.232 ± 0.018 # \$</b> |
| TAG [52:3] | 0.344 ± 0.019  | 0.798 ± 0.033 *  | <b>0.496 ± 0.025 # \$</b> |
| TAG [52:2] | 0.385 ± 0.020  | 0.849 ± 0.027 *  | <b>0.554 ± 0.033 # \$</b> |
| TAG [54:5] | 0.140 ± 0.014  | 0.334 ± 0.012 *  | <b>0.174 ± 0.016 \$</b>   |
| TAG [54:4] | 0.301 ± 0.023  | 0.716 ± 0.032 *  | <b>0.343 ± 0.028 \$</b>   |
| TAG [54:3] | 0.439 ± 0.028  | 0.905 ± 0.023 *  | <b>0.487 ± 0.033 \$</b>   |
| TAG [54:2] | 0.154 ± 0.011  | 0.376 ± 0.006 *  | <b>0.199 ± 0.022 \$</b>   |
| TAG [54:1] | 0.087 ± 0.015  | 0.248 ± 0.028 *  | <b>0.154 ± 0.006 # \$</b> |
| TAG [56:1] | 0.102 ± 0.024  | 0.279 ± 0.045 *  | 0.191 ± 0.029             |
| TAG        | 11.841 ± 0.621 | 26.661 ± 3.745 * | <b>14.057 ± 1.988 \$</b>  |

Class

|       |                |                  |                           |
|-------|----------------|------------------|---------------------------|
| PC    | 31.223 ± 0.304 | 32.038 ± 0.368   | 30.687 ± 0.483            |
| PC-O  | 3.611 ± 0.158  | 3.539 ± 0.109    | 2.999 ± 0.193 \$          |
| PE    | 34.331 ± 0.268 | 36.217 ± 0.147 * | 40.129 ± 0.567 # \$       |
| LPE   | 0.015 ± 0.002  | 0.085 ± 0.014 *  | <b>0.042 ± 0.003 # \$</b> |
| PE-PI | 12.088 ± 0.141 | 12.014 ± 0.217   | 10.433 ± 0.307 # \$       |
| PI    | 8.568 ± 0.068  | 4.286 ± 0.050 *  | 4.393 ± 0.026 #           |
| PS    | 4.470 ± 0.068  | 5.326 ± 0.054 *  | 5.257 ± 0.126 #           |
| LPS   | 0.017 ± 0.002  | 0.106 ± 0.009 *  | 0.062 ± 0.027             |
| PG    | 0.919 ± 0.050  | 0.744 ± 0.015 *  | <b>0.792 ± 0.006 # \$</b> |
| PA    | 0.016 ± 0.002  | 0.137 ± 0.009 *  | <b>0.063 ± 0.004 # \$</b> |
| LPA   | 0.002 ± 0.000  | 0.007 ± 0.001 *  | 0.005 ± 0.001             |
| CL    | 0.800 ± 0.033  | 0.787 ± 0.030    | 0.742 ± 0.020             |
| GlCer | 0.152 ± 0.006  | 0.226 ± 0.039    | 0.166 ± 0.016             |
| Cer   | 0.362 ± 0.025  | 0.697 ± 0.023 *  | 0.605 ± 0.058 #           |
| CerPE | 3.426 ± 0.157  | 3.792 ± 0.090    | 3.627 ± 0.060             |
| MAG   | 0.439 ± 0.069  | 1.570 ± 0.101 *  | <b>1.022 ± 0.179 # \$</b> |
| DAG   | 1.464 ± 0.084  | 2.917 ± 0.271 *  | <b>2.173 ± 0.017 # \$</b> |
| TAG   | 11.841 ± 0.621 | 26.661 ± 3.745 * | <b>14.057 ± 1.988 \$</b>  |

**Table S2.**

|                   |                                                   |
|-------------------|---------------------------------------------------|
| <b>CdsA-attB1</b> | GGGGACAAGTTTGTACAAAAAAGCAGGCTTCATGGCCGAAGTGCGACGC |
| <b>CdsA-attB2</b> | GGGGACCACTTTGTACAAGAAAGCTGGGTTGGTTAACATGTCGCCCAAG |
| <b>dPIS-NotI</b>  | ACTGCGGCGGCCGCAATGACAATTGCCGAGCAC                 |
| <b>dPIS-XbaI</b>  | ACTGCGTCTAGATCACTCCACTTTCTTGCCGCTCA               |
| <b>CdsA-RB1</b>   | CCAGGGATGGCTGATATGGTC                             |
| <b>CdsA-RB2</b>   | GTGGAGCAAAGTGTTGGCAAG                             |
| <b>CdsA-RARB1</b> | GACGCATGACAATGTCCTGTG                             |
| <b>CdsA-RARB2</b> | GATCGAGTGCCAGATAAAGGG                             |
| <b>dPIS-Fw</b>    | CGAGCACGATAACGTCTTCATC                            |
| <b>dPIS-Rev</b>   | GCCGGAGATCACATAGTTGG                              |
| <b>rp49-Fw</b>    | TCGTGAAGAAGCGCACCAAG                              |
| <b>rp49-Rev</b>   | CTTGAAGCGGCGACGCAC                                |
